# Supplementary material for: Selection for predation, not female fecundity, explains sexual size dimorphism in the orchid mantises
Source: Springer Nature journal article supplement (doi:10.1038/srep37753), 2016-12-01
Supplement: 41598_2016_BFsrep37753_MOESM1_ESM.pdf [file 41598_2016_BFsrep37753_MOESM1_ESM.pdf]

## **Supplementary Information**

### **Selection for predation, not female fecundity, explains sexual size dimorphism in the orchid mantises**

**Authors:** Gavin J. Svenson<sup>1,2\*</sup>, Sydney K. Brannoch<sup>1,2</sup>, Henrique M. Rodrigues<sup>1,2</sup>, James O'Hanlon<sup>3</sup>, Frank Wieland<sup>4</sup>

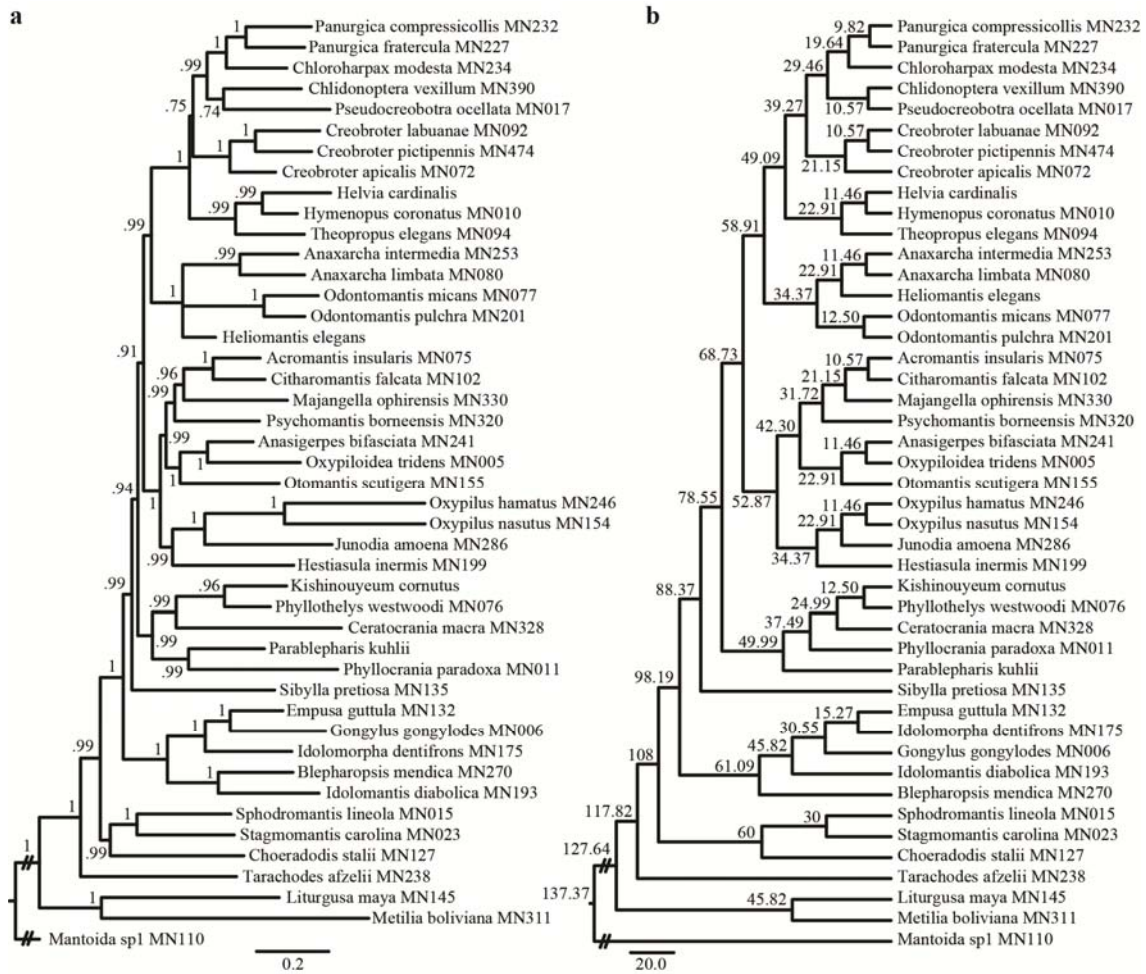

**Figure S1. Total evidence analysis phylogenies.** (a) Mixed model total evidence Bayesian analysis phylogeny (run 1 mean=  $-6.667057e+004$ , run 2 mean=  $-6.666768e+004$ ; harmonic mean=  $-6.666993e+004$ ) including posterior probabilities for each node. Two deep level branches are not to scale to save space. (b) Time calibrated phylogeny estimated with fossil calibration and a root age range taken from prior studies. Average node ages are shown. Two deep level branches are not to scale to save space.

**Table S1. Taxon Sampling, specimen voucher codes, and GenBank accession numbers.** Genes are abbreviated according to those presented in the Methods. Under Code “morph” is used for taxa that lack molecular data and are included only with morphological data.

| Subfamily     | Tribe        | Species                                                | Code  | 12S      | 16S      | 18S      | 28S      | COI      | COII     | H2A      | H3       | ND4      | Wnt      |
|---------------|--------------|--------------------------------------------------------|-------|----------|----------|----------|----------|----------|----------|----------|----------|----------|----------|
| Hymenopodinae | Hymenopodini | <i>Chlidonoptera vexillum</i> Karsch, 1892             | MN390 | -NA-     | KR360507 | KR360540 | KR360577 | KR360608 | -NA-     | -NA-     | -NA-     | -NA-     | KR360712 |
| Hymenopodinae | Hymenopodini | <i>Chloroharpax modesta</i> (Gerstaecker, 1883)        | MN234 | EF383281 | EF383439 | EF383600 | EF383766 | EF383920 | EF384050 | -NA-     | EF384177 | FJ802633 | FJ803089 |
| Hymenopodinae | Hymenopodini | <i>Creobroter apicalis</i> Saussure, 1869              | MN072 | EF383194 | EF383354 | EF383514 | EF383675 | EF383837 | EF383964 | KR360629 | EF384093 | FJ802487 | FJ802985 |
| Hymenopodinae | Hymenopodini | <i>Creobroter labuanae</i> Hebard, 1920                | MN092 | FJ806008 | FJ806183 | FJ806370 | FJ806569 | FJ802787 | FJ806897 | KR360636 | FJ806734 | FJ802507 | FJ803001 |
| Hymenopodinae | Hymenopodini | <i>Creobroter pictipennis</i> Wood-Mason, 1878         | MN474 | KR360496 | -NA-     | KR360563 | KR360596 | KR360619 | -NA-     | -NA-     | KR360685 | -NA-     | KR360718 |
| Hymenopodinae | Hymenopodini | <i>Helvia cardinalis</i> Stål, 1877                    | morph | -NA-     | -NA-     | -NA-     | -NA-     | -NA-     | -NA-     | -NA-     | -NA-     | -NA-     | -NA-     |
| Hymenopodinae | Hymenopodini | <i>Hymenopus coronatus</i> (Olivier, 1792)             | MN010 | EF383156 | EF383316 | EF383476 | EF383638 | EF383800 | AY491276 | KR360626 | AY491334 | FJ802425 | FJ802930 |
| Hymenopodinae | Hymenopodini | <i>Panurgica compressicollis</i> Saussure, 1898        | MN232 | FJ806062 | FJ806238 | FJ806427 | FJ806627 | FJ802841 | FJ806952 | -NA-     | FJ806789 | FJ802631 | FJ803087 |
| Hymenopodinae | Hymenopodini | <i>Panurgica fratercula</i> Rehn, 1912                 | MN227 | EF383276 | EF383434 | EF383595 | EF383761 | EF383915 | EF384046 | -NA-     | EF384172 | FJ802626 | FJ803082 |
| Hymenopodinae | Hymenopodini | <i>Pseudocreobotra ocellata</i> (P. de Beauvois, 1805) | MN017 | FJ805978 | FJ806155 | FJ806341 | FJ806539 | FJ802757 | AY491283 | KR360627 | AY491341 | FJ802432 | FJ802937 |
| Hymenopodinae | Hymenopodini | <i>Theopropus elegans</i> (Westwood, 1832)             | MN094 | FJ806010 | FJ806185 | FJ806372 | FJ806571 | FJ802789 | FJ806899 | KR360637 | FJ806735 | FJ802509 | FJ803003 |
| Hymenopodinae | Anaxarchini  | <i>Anaxarcha intermedia</i> Mukherjee, 1995            | MN253 | EF383294 | EF383452 | EF383613 | EF383779 | EF383933 | EF384063 | -NA-     | EF384190 | FJ802651 | FJ803106 |
| Hymenopodinae | Anaxarchini  | <i>Anaxarcha limbata</i> Giglio-Tos, 1915              | MN080 | FJ806003 | FJ806178 | FJ806365 | FJ806564 | FJ802782 | FJ806892 | KR360634 | FJ806729 | FJ802495 | FJ802991 |
| Hymenopodinae | Anaxarchini  | <i>Heliomantis elegans</i> (Navás, 1904)               | morph | -NA-     | -NA-     | -NA-     | -NA-     | -NA-     | -NA-     | -NA-     | -NA-     | -NA-     | -NA-     |
| Hymenopodinae | Anaxarchini  | <i>Odontomantis pulchra</i> (Fabricius, 1787)          | MN201 | FJ806055 | FJ806231 | FJ806419 | FJ806621 | FJ802834 | FJ806946 | KR360645 | FJ806782 | FJ802606 | -NA-     |
| Hymenopodinae | Anaxarchini  | <i>Odontomantis micans</i> (Saussure, 1871)            | MN077 | EF383196 | EF383356 | EF383516 | EF383677 | EF383839 | EF383966 | KR360633 | EF384095 | FJ802490 | FJ802987 |
| Acromantinae  | Acromantini  | <i>Acromantis insularis</i> Giglio-Tos, 1915           | MN075 | EF383196 | EF383356 | EF383516 | EF383677 | EF383839 | EF383966 | KR360631 | EF384095 | FJ802490 | FJ802987 |
| Acromantinae  | Acromantini  | <i>Citharomantis falcata</i> Rehn, 1909                | MN102 | EF383212 | EF383372 | EF383532 | EF383695 | EF383855 | EF383982 | -NA-     | EF384111 | FJ802517 | FJ803009 |
| Acromantinae  | Acromantini  | <i>Majangella ophirensis</i> Werner, 1922              | MN330 | FJ806121 | FJ806301 | FJ806497 | FJ806699 | FJ802899 | FJ807017 | KR360659 | FJ806856 | FJ802724 | FJ803161 |
| Acromantinae  | Acromantini  | <i>Psychomantis borneensis</i> (de Haan, 1842)         | MN320 | FJ806113 | FJ806291 | FJ806487 | FJ806689 | FJ802890 | FJ807007 | KR360658 | FJ806847 | FJ802714 | FJ803155 |
| Acromantinae  | Otomantini   | <i>Anasigerpes bifasciata</i> Giglio-Tos, 1915         | MN241 | EF383287 | EF383445 | EF383606 | EF383772 | EF383926 | EF384056 | KR360649 | EF384183 | FJ802640 | FJ803096 |
| Acromantinae  | Otomantini   | <i>Otomantis scutigera</i> Bolivar, 1890               | MN155 | FJ806036 | FJ806211 | FJ806398 | FJ806597 | FJ802816 | FJ806925 | KR360638 | FJ806761 | FJ802564 | FJ803046 |
| Acromantinae  | Otomantini   | <i>Oxypiloidea tridens</i> (Saussure, 1872)            | MN005 | FJ805976 | FJ806153 | FJ806339 | FJ806537 | FJ802754 | AY491273 | KR360625 | AY491330 | FJ802420 | FJ802926 |
| Oxypilinae    | -            | <i>Hestiasula inermis</i> (Wood-Mason, 1879)           | MN199 | EF383257 | EF383416 | EF383576 | EF383742 | FJ802833 | EF384027 | KR360644 | EF384154 | FJ802604 | FJ803067 |
| Oxypilinae    | -            | <i>Junodia amoena</i> Schulthess-Rechberg, 1899        | MN286 | FJ806086 | FJ806260 | FJ806452 | FJ806650 | FJ802861 | FJ806975 | -NA-     | FJ806814 | FJ802681 | FJ803130 |
| Oxypilinae    | -            | <i>Oxypilus hamatus</i> Roy, 1966                      | MN246 | FJ806066 | FJ806242 | FJ806431 | FJ806631 | FJ802845 | FJ806956 | KR360651 | FJ806793 | FJ802645 | FJ803101 |
| Oxypilinae    | -            | <i>Oxypilus nasutus</i> (Fabricius, 1787)              | MN154 | FJ806035 | FJ806210 | FJ806397 | FJ806596 | FJ802815 | FJ806924 | -NA-     | FJ806760 | FJ802563 | FJ803045 |

| Subfamily       | Tribe         | Species                                          | Code  | 12S      | 16S      | 18S      | 28S      | COI      | COII     | H2A      | H3       | ND4      | Wnt      |
|-----------------|---------------|--------------------------------------------------|-------|----------|----------|----------|----------|----------|----------|----------|----------|----------|----------|
| Phyllocraniinae | -             | <i>Parablepharis kuhlii</i> (de Haan, 1842)      | morph | -NA-     | -NA-     | -NA-     | -NA-     | -NA-     | -NA-     | -NA-     | -NA-     | -NA-     | -NA-     |
| Phyllocraniinae | -             | <i>Phyllocrania paradoxa</i> Burmeister, 1838    | MN011 | EF383157 | EF383317 | EF383477 | EF383639 | EF383801 | AY491277 | -NA-     | AY491335 | FJ802426 | FJ802931 |
| Phyllothelyinae | -             | <i>Ceratocrania macra</i> Westwood, 1889         | MN328 | -NA-     | FJ806299 | FJ806495 | FJ806697 | FJ802897 | FJ807015 | -NA-     | FJ806854 | FJ802722 | -NA-     |
| Phyllothelyinae | -             | <i>Kishinouyeum cornutus</i> Zhang, 1988         | morph | -NA-     | -NA-     | -NA-     | -NA-     | -NA-     | -NA-     | -NA-     | -NA-     | -NA-     | -NA-     |
| Phyllothelyinae | -             | <i>Phyllothelys westwoodi</i> (Wood-Mason, 1876) | MN076 | EF383197 | EF383357 | EF383517 | EF383678 | EF383840 | EF383967 | KR360632 | EF384096 | FJ802491 | FJ802988 |
| Sibyllinae      | -             | <i>Sibylla pretiosa</i> Stål, 1856               | MN135 | FJ806029 | FJ806204 | FJ806391 | FJ806590 | FJ802808 | FJ806918 | -NA-     | FJ806754 | FJ802548 | FJ803032 |
| Blepharodinae   | Blepharodini  | <i>Blepharopsis mendica</i> (Fabricius, 1775)    | MN270 | FJ806077 | -NA-     | FJ806442 | -NA-     | -NA-     | FJ806966 | KR360652 | FJ806803 | FJ802666 | FJ803117 |
| Blepharodinae   | Idolomantini  | <i>Idolomantis diabolica</i> (Saussure, 1869)    | MN193 | EF383253 | EF383412 | EF383572 | EF383738 | EF383894 | EF384023 | KR360643 | EF384150 | FJ802598 | FJ803061 |
| Empusinae       | Empusini      | <i>Empusa guttula</i> (Thunberg, 1815)           | MN132 | EF383226 | EF383386 | EF383546 | EF383709 | EF383869 | EF383996 | -NA-     | EF384125 | FJ802545 | FJ803029 |
| Empusinae       | Empusini      | <i>Gongylus gongylodes</i> (Linnaeus, 1758)      | MN006 | EF383152 | EF383312 | EF383472 | EF383634 | EF383797 | AY491274 | -NA-     | AY491331 | FJ802421 | -NA-     |
| Empusinae       | Idolomorphini | <i>I. dentifrons</i> Saussure & Zehntner, 1895   | MN175 | EF383246 | EF383405 | EF383565 | EF383731 | EF383887 | EF384016 | KR360642 | EF384143 | FJ802581 | FJ803057 |
| -               | -             | <i>Mantoida</i> sp.                              | MN110 | FJ806015 | FJ806190 | FJ806377 | FJ806576 | FJ802794 | FJ806904 | -NA-     | FJ806740 | FJ802524 | -NA-     |
| -               | -             | <i>Liturgusa maya</i> Saussure & Zehntner, 1894  | MN145 | EF383231 | EF383391 | EF383551 | EF383714 | FJ802812 | EF384001 | -NA-     | EF384130 | FJ802555 | FJ803037 |
| Acanthopinae    | -             | <i>Metilia boliviana</i> (Werner, 1927)          | MN311 | FJ806107 | FJ806282 | FJ806478 | FJ806680 | FJ802881 | FJ806999 | KR360657 | FJ806838 | FJ802705 | FJ803149 |
| Choeradodinae   | -             | <i>Choeradodis stalii</i> Wood-Mason, 1880       | MN127 | EF383225 | EF383385 | EF383545 | EF383708 | EF383868 | EF383995 | -NA-     | EF384124 | FJ802540 | FJ803024 |
| Mantinae        | -             | <i>Sphodromantis lineola</i> (Burmeister, 1838)  | MN015 | EF383160 | EF383320 | EF383480 | EF383642 | EF383804 | AY491281 | -NA-     | AY491339 | FJ802430 | FJ802935 |
| Stagmomantinae  | -             | <i>Stagmomantis carolina</i> (Johansson, 1763)   | MN023 | EF383165 | EF383325 | EF383485 | EF383647 | EF383809 | AY491289 | -NA-     | AY491347 | FJ802438 | FJ802943 |
| Tarachodinae    | -             | <i>Tarachodes afzelii</i> (Stål, 1871)           | MN238 | EF383285 | EF383443 | EF383604 | EF383770 | EF383924 | EF384054 | -NA-     | EF384181 | FJ802637 | FJ803093 |

**Table S2. Complete measurement data for all 129 measured individuals across the taxon sampling.** Body length, pronotum length, meso- and metafemoral lobe apical lobe area, and meso- and metafemoral length are all direct measurements. Two ratios are present with an additive total category.

| Taxon                         | Sex    | Specimen        | Body Length | Pronotum Length | Mesofemoral ventral apical lobe area | Metafemoral ventral apical lobe area | Mesofemoral Length | Metafemoral Length | Size ratio of mesofemoral leg lobe area | Size ratio of metathoracic leg lobe area | Total Prop Leg Lobe Area |
|-------------------------------|--------|-----------------|-------------|-----------------|--------------------------------------|--------------------------------------|--------------------|--------------------|-----------------------------------------|------------------------------------------|--------------------------|
| <i>Creobroter pictipennis</i> | Male   | GSMC003546      | 22.859      | 5.453           | 0.190                                | 0.587                                | 5.644              | 6.632              | 0.034                                   | 0.089                                    | 0.063                    |
| <i>Creobroter pictipennis</i> | Male   | GSMC003909      | 27.817      | 6.050           | 0.142                                | 0.477                                | 6.553              | 7.330              | 0.022                                   | 0.065                                    | 0.045                    |
| <i>Creobroter pictipennis</i> | Male   | GSMC003983      | 29.133      | 6.248           | 0.192                                | 0.552                                | 7.084              | 7.997              | 0.027                                   | 0.069                                    | 0.049                    |
| <i>Creobroter pictipennis</i> | Female | GSMC003984      | 29.207      | 7.145           | 0.382                                | 0.995                                | 6.538              | 7.933              | 0.058                                   | 0.125                                    | 0.095                    |
| <i>Creobroter pictipennis</i> | Female | MANTO0002       | 27.446      | 7.111           | 0.302                                | 0.897                                | 6.642              | 7.659              | 0.045                                   | 0.117                                    | 0.084                    |
| <i>Creobroter pictipennis</i> | Female | GSMC003545      | 28.984      | 6.689           | 0.343                                | 0.836                                | 6.517              | 7.834              | 0.053                                   | 0.107                                    | 0.082                    |
| <i>Creobroter apicalis</i>    | Male   | GSMC002236      | 24.993      | 6.680           | 0.915                                | 1.687                                | 7.812              | 8.853              | 0.117                                   | 0.191                                    | 0.156                    |
| <i>Creobroter apicalis</i>    | Male   | GSMC002225      | 25.943      | 6.357           | 0.529                                | 1.141                                | 6.973              | 7.760              | 0.076                                   | 0.147                                    | 0.113                    |
| <i>Creobroter apicalis</i>    | Female | GSMC002210      | 33.523      | 9.353           | 1.750                                | 2.993                                | 9.275              | 10.809             | 0.189                                   | 0.277                                    | 0.236                    |
| <i>Creobroter apicalis</i>    | Female | GSMC002227      | 31.892      | 8.505           | 1.215                                | 2.075                                | 8.656              | 10.094             | 0.140                                   | 0.206                                    | 0.175                    |
| <i>Creobroter labuanae</i>    | Male   | USNM00873192    | 28.748      | 6.102           | 0.394                                | 0.909                                | 7.084              | 8.003              | 0.056                                   | 0.114                                    | 0.086                    |
| <i>Creobroter labuanae</i>    | Male   | USNM00873199    | 27.713      | 6.218           | 0.426                                | 0.658                                | 7.195              | 8.039              | 0.059                                   | 0.082                                    | 0.071                    |
| <i>Creobroter labuanae</i>    | Male   | USNM00873200    | 27.900      | 6.423           | 0.389                                | 0.734                                | 7.259              | 8.041              | 0.054                                   | 0.091                                    | 0.073                    |
| <i>Creobroter labuanae</i>    | Male   | USNM00873206    | 27.496      | 6.251           | 0.334                                | 0.780                                | 6.938              | 8.040              | 0.048                                   | 0.097                                    | 0.074                    |
| <i>Creobroter labuanae</i>    | Male   | USNM00873209    | 28.454      | 6.401           | 0.308                                | 0.816                                | 7.461              | 8.557              | 0.041                                   | 0.095                                    | 0.070                    |
| <i>Creobroter labuanae</i>    | Female | USNM00873204    | 35.781      | 8.290           | 1.385                                | 2.552                                | 8.161              | 9.520              | 0.170                                   | 0.268                                    | 0.223                    |
| <i>Creobroter labuanae</i>    | Female | USNM00873230    | 31.152      | 8.083           | 1.446                                | 2.126                                | 8.167              | 9.554              | 0.177                                   | 0.223                                    | 0.202                    |
| <i>Creobroter labuanae</i>    | Female | USNM00873231    | 36.790      | 8.230           | 1.231                                | 2.105                                | 8.190              | 9.545              | 0.150                                   | 0.221                                    | 0.188                    |
| <i>Creobroter labuanae</i>    | Female | USNM00873234    | 29.617      | 7.169           | 1.071                                | 1.938                                | 7.078              | 8.332              | 0.151                                   | 0.233                                    | 0.195                    |
| <i>Creobroter labuanae</i>    | Female | Mindanao        | 38.018      | 8.127           | 1.289                                | 2.656                                | 8.280              | 9.509              | 0.156                                   | 0.279                                    | 0.222                    |
| <i>Panurgica fratercula</i>   | Male   | GSMC000825      | 22.532      | 4.857           | 0.404                                | 0.838                                | 5.997              | 6.720              | 0.067                                   | 0.125                                    | 0.098                    |
| <i>Panurgica fratercula</i>   | Male   | USNMENT00873129 | 23.490      | 4.815           | 0.274                                | 0.594                                | 5.780              | 6.538              | 0.047                                   | 0.091                                    | 0.070                    |
| <i>Panurgica fratercula</i>   | Female | GSMC003481      | 26.256      | 6.259           | 1.196                                | 2.073                                | 5.917              | 7.114              | 0.202                                   | 0.291                                    | 0.251                    |

| Taxon                            | Sex    | Specimen                      | Body Length | Pronotum Length | Mesofemoral ventral apical lobe area | Metafemoral ventral apical lobe area | Mesofemoral Length | Metafemoral Length | Size ratio of mesofemoral leg lobe area | Size ratio of metathoracic leg lobe area | Total Prop Leg Lobe Area |
|----------------------------------|--------|-------------------------------|-------------|-----------------|--------------------------------------|--------------------------------------|--------------------|--------------------|-----------------------------------------|------------------------------------------|--------------------------|
| <i>Panurgica compressicollis</i> | Male   | GSMC004158                    | 30.266      | 5.588           | 0.847                                | 1.356                                | 6.223              | 7.202              | 0.136                                   | 0.188                                    | 0.164                    |
| <i>Panurgica compressicollis</i> | Male   | GSMC003520                    | 28.070      | 6.001           | 0.841                                | 1.258                                | 6.555              | 7.427              | 0.128                                   | 0.169                                    | 0.150                    |
| <i>Panurgica compressicollis</i> | Male   | Liberia                       | 27.210      | 5.548           | 0.452                                | 0.707                                | 7.775              | 7.120              | 0.058                                   | 0.099                                    | 0.078                    |
| <i>Panurgica compressicollis</i> | Female | B. Congo                      | 40.067      | 7.511           | 2.425                                | 3.028                                | 7.162              | 8.296              | 0.339                                   | 0.365                                    | 0.353                    |
| <i>Panurgica compressicollis</i> | Female | B. Congo                      | 38.049      | 7.064           | 2.234                                | 3.429                                | 6.740              | 7.919              | 0.331                                   | 0.433                                    | 0.386                    |
| <i>Chloroharpax modesta</i>      | Male   | GSMC003512                    | 26.328      | 5.434           | 0.099                                | 0.070                                | 5.706              | 5.947              | 0.017                                   | 0.012                                    | 0.015                    |
| <i>Chloroharpax modesta</i>      | Male   | GSMC004241                    | 23.581      | 4.780           | 0.000                                | 0.000                                | 5.313              | 5.514              | 0.000                                   | 0.000                                    | 0.000                    |
| <i>Chloroharpax modesta</i>      | Male   | GSMC003514                    | 23.299      | 4.749           | 0.000                                | 0.037                                | 5.166              | 5.619              | 0.000                                   | 0.007                                    | 0.003                    |
| <i>Chloroharpax modesta</i>      | Male   | GSMC004124                    | 21.786      | 4.555           | 0.323                                | 0.094                                | 4.760              | 5.374              | 0.068                                   | 0.017                                    | 0.041                    |
| <i>Chloroharpax modesta</i>      | Male   | GSMC003513                    | 27.607      | 5.300           | 0.248                                | 0.086                                | 5.693              | 6.202              | 0.044                                   | 0.014                                    | 0.028                    |
| <i>Chloroharpax modesta</i>      | Female | Liberia                       | 30.464      | 6.664           | 0.092                                | 0.200                                | 6.612              | 7.330              | 0.014                                   | 0.027                                    | 0.021                    |
| <i>Chloroharpax modesta</i>      | Female | Liberia                       | 31.023      | 6.555           | 0.026                                | 0.085                                | 6.423              | 6.996              | 0.004                                   | 0.012                                    | 0.008                    |
| <i>Chloroharpax modesta</i>      | Female | USNMENT00873161               | 27.336      | 6.675           | 0.000                                | 0.000                                | 7.042              | 6.997              | 0.000                                   | 0.000                                    | 0.000                    |
| <i>Chloroharpax modesta</i>      | Female | USNMENT00873162               | 26.000      | 6.517           | 0.000                                | 0.000                                | 6.121              | 6.920              | 0.000                                   | 0.000                                    | 0.000                    |
| <i>Pseudocreobotra ocellata</i>  | Male   | GSMC005119                    | 24.369      | 4.573           | 0.833                                | 1.180                                | 5.961              | 6.763              | 0.140                                   | 0.174                                    | 0.158                    |
| <i>Pseudocreobotra ocellata</i>  | Male   | Liberia, Monrovia, VI-22-1958 | 23.448      | 5.144           | 0.927                                | 1.268                                | 6.606              | 7.478              | 0.140                                   | 0.170                                    | 0.156                    |
| <i>Pseudocreobotra ocellata</i>  | Male   | Angola, Saurimo, 1950         | 29.239      | 5.133           | 1.853                                | 2.685                                | 6.863              | 7.763              | 0.270                                   | 0.346                                    | 0.310                    |
| <i>Pseudocreobotra ocellata</i>  | Male   | GSMC002176                    | 25.606      | 5.040           | 1.762                                | 2.398                                | 6.918              | 7.399              | 0.255                                   | 0.324                                    | 0.291                    |
| <i>Pseudocreobotra ocellata</i>  | Male   | Garua                         | 26.290      | 4.629           | 1.255                                | 1.154                                | 6.175              | 7.111              | 0.203                                   | 0.162                                    | 0.181                    |
| <i>Pseudocreobotra ocellata</i>  | Female | GSMC005120                    | 33.274      | 6.625           | 2.280                                | 2.741                                | 7.524              | 8.703              | 0.303                                   | 0.315                                    | 0.309                    |
| <i>Pseudocreobotra ocellata</i>  | Female | GSMC004486                    | 29.103      | 5.551           | 1.541                                | 2.484                                | 6.766              | 8.080              | 0.228                                   | 0.307                                    | 0.271                    |
| <i>Pseudocreobotra ocellata</i>  | Female | Mali                          | 27.751      | 5.594           | 1.923                                | 3.110                                | 6.600              | 7.775              | 0.291                                   | 0.400                                    | 0.350                    |
| <i>Chlidonoptera lestoni</i>     | Male   | GSMC004222                    | 32.227      | 6.211           | 0.879                                | 1.454                                | 6.884              | 8.583              | 0.128                                   | 0.169                                    | 0.151                    |
| <i>Chlidonoptera lestoni</i>     | Male   | GSMC004180                    | 31.282      | 6.475           | 1.223                                | 1.615                                | 7.599              | 8.620              | 0.161                                   | 0.187                                    | 0.175                    |
| <i>Chlidonoptera lestoni</i>     | Male   | GSMC004240                    | 28.972      | 6.131           | 1.075                                | 1.499                                | 7.456              | 8.345              | 0.144                                   | 0.180                                    | 0.163                    |
| <i>Chlidonoptera lestoni</i>     | Male   | GSMC004221                    | 30.331      | 6.331           | 1.224                                | 1.660                                | 7.616              | 8.599              | 0.161                                   | 0.193                                    | 0.178                    |
| <i>Chlidonoptera lestoni</i>     | Male   | GSMC004188                    | 27.150      | 5.968           | 0.845                                | 1.353                                | 7.164              | 7.930              | 0.118                                   | 0.171                                    | 0.146                    |
| <i>Chlidonoptera lestoni</i>     | Male   | GSMC004187                    | 28.344      | 6.429           | 1.321                                | 1.667                                | 7.342              | 8.430              | 0.180                                   | 0.198                                    | 0.189                    |
| <i>Chlidonoptera lestoni</i>     | Male   | Wien117                       | 28.637      | 6.145           | 1.300                                | 1.841                                | 7.231              | 8.159              | 0.180                                   | 0.226                                    | 0.204                    |
| <i>Chlidonoptera lestoni</i>     | Male   | Wien116                       | 29.004      | 6.391           | 1.500                                | 1.775                                | 7.521              | 8.488              | 0.199                                   | 0.209                                    | 0.205                    |
| <i>Chlidonoptera lestoni</i>     | Male   | Wien118                       | 27.097      | 6.149           | 1.340                                | 1.900                                | 7.220              | 8.138              | 0.186                                   | 0.233                                    | 0.211                    |

| Taxon                        | Sex    | Specimen                                                   | Body Length | Pronotum Length | Mesofemoral ventral apical lobe area | Metafemoral ventral apical lobe area | Mesofemoral Length | Metafemoral Length | Size ratio of mesofemoral leg lobe area | Size ratio of metathoracic leg lobe area | Total Prop Leg Lobe Area |
|------------------------------|--------|------------------------------------------------------------|-------------|-----------------|--------------------------------------|--------------------------------------|--------------------|--------------------|-----------------------------------------|------------------------------------------|--------------------------|
| <i>Chlidonoptera lestoni</i> | Female | Wien119                                                    | 33.203      | 8.391           | 5.080                                | 6.159                                | 8.900              | 10.055             | 0.571                                   | 0.613                                    | 0.593                    |
| <i>Hymenopus coronatus</i>   | Male   | GSMC003908                                                 | 28.258      | 5.739           | 6.788                                | 7.477                                | 6.578              | 7.563              | 1.032                                   | 0.989                                    | 1.009                    |
| <i>Hymenopus coronatus</i>   | Male   | GSMC003549                                                 | 28.649      | 5.984           | 8.236                                | 8.295                                | 6.591              | 7.636              | 1.250                                   | 1.086                                    | 1.162                    |
| <i>Hymenopus coronatus</i>   | Male   | GSMC003548                                                 | 27.884      | 5.955           | 8.748                                | 8.365                                | 7.058              | 7.926              | 1.239                                   | 1.055                                    | 1.142                    |
| <i>Hymenopus coronatus</i>   | Male   | GSMC003550                                                 | 28.622      | 6.009           | 8.009                                | 6.385                                | 7.092              | 7.183              | 1.129                                   | 0.889                                    | 1.008                    |
| <i>Hymenopus coronatus</i>   | Male   | GSMC003551                                                 | 27.106      | 5.834           | 9.478                                | 10.140                               | 7.148              | 8.115              | 1.326                                   | 1.250                                    | 1.285                    |
| <i>Hymenopus coronatus</i>   | Female | USNMENT01073092                                            | 56.567      | 14.260          | 71.887                               | 86.681                               | 14.343             | 16.681             | 5.012                                   | 5.196                                    | 5.111                    |
| <i>Hymenopus coronatus</i>   | Female | USNMENT01073112                                            | 54.625      | 12.888          | 57.865                               | 68.733                               | 13.222             | 14.922             | 4.376                                   | 4.606                                    | 4.498                    |
| <i>Hymenopus coronatus</i>   | Female | Depol                                                      | 50.594      | 12.072          | 49.926                               | 59.095                               | 12.251             | 14.230             | 4.075                                   | 4.153                                    | 4.117                    |
| <i>Hymenopus coronatus</i>   | Female | USNMENT01073243                                            | 52.112      | 12.998          | 50.416                               | 55.965                               | 12.821             | 14.388             | 3.932                                   | 3.890                                    | 3.910                    |
| <i>Helvia cardinalis</i>     | Male   | GSMC003552                                                 | 23.547      | 4.768           | 0.864                                | 1.244                                | 4.766              | 5.323              | 0.181                                   | 0.234                                    | 0.209                    |
| <i>Helvia cardinalis</i>     | Male   | Holotype NRM-MANT<br>0002869<br>Cameron Highlands,<br>SMNK | 14.914      | 3.518           | 0.700                                | 1.100                                | 3.179              | 3.600              | 0.220                                   | 0.306                                    | 0.266                    |
| <i>Helvia cardinalis</i>     | Male   | Trong<br>Cameron Highlands,<br>SMNK                        | 19.960      | 4.475           | -                                    | -                                    | -                  | -                  | -                                       | -                                        | -                        |
| <i>Helvia cardinalis</i>     | Female | Trong<br>Cameron Highlands,<br>SMNK                        | 42.729      | 9.261           | 7.107                                | 8.211                                | 8.265              | 9.127              | 0.860                                   | 0.900                                    | 0.881                    |
| <i>Helvia cardinalis</i>     | Female | Trong<br>Cameron Highlands,<br>SMNK                        | 32.030      | 8.250           | -                                    | -                                    | -                  | -                  | -                                       | -                                        | -                        |
| <i>Theopropus elegans</i>    | Male   | Borneo, Crocker Range                                      | 20.138      | 4.661           | 0.476                                | 0.693                                | 4.283              | 5.118              | 0.111                                   | 0.135                                    | 0.124                    |
| <i>Theopropus elegans</i>    | Male   | Sabah BMNH                                                 | 20.230      | 4.624           | 0.359                                | 0.597                                | 4.328              | 4.865              | 0.083                                   | 0.123                                    | 0.104                    |
| <i>Theopropus elegans</i>    | Male   | Sabah BMNH                                                 | 20.873      | 4.657           | 0.468                                | 0.577                                | 4.261              | 5.065              | 0.110                                   | 0.114                                    | 0.112                    |
| <i>Theopropus elegans</i>    | Male   | USNMENT01073151                                            | 19.627      | 4.436           | 0.461                                | 0.714                                | 4.417              | 4.943              | 0.104                                   | 0.144                                    | 0.126                    |
| <i>Theopropus elegans</i>    | Female | USNMENT01073154                                            | 40.678      | 10.231          | 2.528                                | 3.637                                | 9.745              | 10.942             | 0.259                                   | 0.332                                    | 0.298                    |
| <i>Theopropus elegans</i>    | Female | GSMC002149                                                 | 38.340      | 10.920          | 3.005                                | 3.212                                | 9.702              | 11.318             | 0.310                                   | 0.284                                    | 0.296                    |
| <i>Theopropus elegans</i>    | Female | GSMC003791                                                 | 37.429      | 9.661           | 2.508                                | 3.706                                | 9.166              | 10.761             | 0.274                                   | 0.344                                    | 0.312                    |
| <i>Theopropus elegans</i>    | Female | Malaysia, KL                                               | 39.693      | 10.802          | 3.105                                | 4.264                                | 9.638              | 11.241             | 0.322                                   | 0.379                                    | 0.353                    |
| <i>Theopropus elegans</i>    | Female | Sumatra                                                    | 43.899      | 10.581          | 2.734                                | 4.947                                | 10.293             | 11.967             | 0.266                                   | 0.413                                    | 0.345                    |
| <i>Anaxarcha intermedia</i>  | Male   | GSMC002237                                                 | 23.500      | 7.705           | 0.000                                | 0.000                                | 6.000              | 6.661              | 0.000                                   | 0.000                                    | 0.000                    |
| <i>Anaxarcha intermedia</i>  | Female | India: Kerala, BMNH                                        | 32.404      | 10.076          | 0.000                                | 0.000                                | 7.099              | 7.648              | 0.000                                   | 0.000                                    | 0.000                    |
| <i>Anaxarcha limbata</i>     | Male   | GSMC004558                                                 | 29.134      | 10.089          | 0.000                                | 0.000                                | 7.569              | 8.973              | 0.000                                   | 0.000                                    | 0.000                    |
| <i>Anaxarcha limbata</i>     | Female | GSMC004559                                                 | 39.296      | 12.185          | 0.000                                | 0.000                                | 8.991              | 10.626             | 0.000                                   | 0.000                                    | 0.000                    |
| <i>Anaxarcha limbata</i>     | Female | GSMC004560                                                 | 39.493      | 12.858          | 0.000                                | 0.000                                | 8.778              | 10.392             | 0.000                                   | 0.000                                    | 0.000                    |
| <i>Heliomantis elegans</i>   | Male   | BMNH                                                       | 34.000      | 11.500          | 0.100                                | 0.400                                | 7.550              | 9.100              | 0.013                                   | 0.044                                    | 0.030                    |
| <i>Heliomantis elegans</i>   | Female | BMNH                                                       | 47.000      | 15.000          | 0.210                                | 0.610                                | 10.790             | 12.930             | 0.019                                   | 0.047                                    | 0.035                    |
| <i>Odontomantis pulchra</i>  | Male   | Taiwan, CASENT                                             | 17.082      | 5.010           | 0.000                                | 0.000                                | 4.415              | 5.210              | 0.000                                   | 0.000                                    | 0.000                    |

| Taxon                          | Sex    | Specimen          | Body Length | Pronotum Length | Mesofemoral ventral apical lobe area | Metafemoral ventral apical lobe area | Mesofemoral Length | Metafemoral Length | Size ratio of mesofemoral leg lobe area | Size ratio of metathoracic leg lobe area | Total Prop Leg Lobe Area |
|--------------------------------|--------|-------------------|-------------|-----------------|--------------------------------------|--------------------------------------|--------------------|--------------------|-----------------------------------------|------------------------------------------|--------------------------|
| <i>Odontomantis pulchra</i>    | Male   | Taiwan, CASENT    | 17.427      | 4.766           | 0.000                                | 0.000                                | 3.952              | 5.203              | 0.000                                   | 0.000                                    | 0.000                    |
| <i>Odontomantis pulchra</i>    | Female | Taiwan, CASENT    | 24.068      | 6.450           | 0.000                                | 0.000                                | 5.493              | 6.477              | 0.000                                   | 0.000                                    | 0.000                    |
| <i>Odontomantis pulchra</i>    | Female | Taiwan, CASENT    | 22.502      | 6.469           | 0.000                                | 0.000                                | 5.403              | 6.368              | 0.000                                   | 0.000                                    | 0.000                    |
| <i>Odontomantis pulchra</i>    | Female | Taiwan, CASENT    | 22.299      | 6.368           | 0.000                                | 0.000                                | 5.659              | 6.552              | 0.000                                   | 0.000                                    | 0.000                    |
| <i>Odontomantis micans</i>     | Male   | GSMC000751        | 14.212      | 4.169           | 0.000                                | 0.000                                | 3.790              | 4.278              | 0.000                                   | 0.000                                    | 0.000                    |
| <i>Odontomantis micans</i>     | Male   | GSMC000749        | 13.895      | 4.382           | 0.000                                | 0.000                                | 4.005              | 4.691              | 0.000                                   | 0.000                                    | 0.000                    |
| <i>Odontomantis micans</i>     | Female | GSMC000748        | 18.900      | 5.322           | 0.000                                | 0.000                                | 4.713              | 5.471              | 0.000                                   | 0.000                                    | 0.000                    |
| <i>Acromantis insularis</i>    | Female | GSMC002214        | 30.287      | 10.690          | 0.841                                | 1.463                                | 6.082              | 7.672              | 0.138                                   | 0.191                                    | 0.168                    |
| <i>Acromantis insularis</i>    | Male   | GSMC002209        | 24.770      | 9.072           | 0.272                                | 0.495                                | 5.294              | 6.553              | 0.051                                   | 0.076                                    | 0.065                    |
| <i>Citharomantis falcata</i>   | Male   | GSMC002196        | 20.105      | 6.494           | 0.045                                | 0.066                                | 4.820              | 5.482              | 0.009                                   | 0.012                                    | 0.011                    |
| <i>Citharomantis falcata</i>   | Male   | Borneo            | 21.647      | 6.407           | 0.066                                | 0.072                                | 5.231              | 5.978              | 0.013                                   | 0.012                                    | 0.012                    |
| <i>Citharomantis falcata</i>   | Female | GSMC003538        | 29.823      | 8.875           | 0.259                                | 0.327                                | 6.357              | 7.412              | 0.041                                   | 0.044                                    | 0.043                    |
| <i>Citharomantis falcata</i>   | Female | CASENT Malaysia   | 27.592      | 9.095           | 0.237                                | 0.339                                | 6.448              | 7.664              | 0.037                                   | 0.044                                    | 0.041                    |
| <i>Majangella ophirensis</i>   | Female | GSMC005128        | 37.200      | 11.946          | 0.151                                | 0.216                                | 8.744              | 9.548              | 0.017                                   | 0.023                                    | 0.020                    |
| <i>Majangella ophirensis</i>   | Male   | GSMC005127        | 30.179      | 9.431           | 0.053                                | 0.078                                | 7.141              | 8.382              | 0.007                                   | 0.009                                    | 0.008                    |
| <i>Majangella ophirensis</i>   | Male   | GSMC003553        | 33.064      | 9.165           | 0.170                                | 0.238                                | 7.100              | 8.389              | 0.024                                   | 0.028                                    | 0.026                    |
| <i>Majangella ophirensis</i>   | Male   | GSMC003554        | 31.371      | 8.797           | 0.185                                | 0.213                                | 7.119              | 8.395              | 0.026                                   | 0.025                                    | 0.026                    |
| <i>Psychomantis borneensis</i> | Female | GSMC003985        | 42.347      | 14.274          | 0.888                                | 1.180                                | 7.154              | 9.465              | 0.124                                   | 0.125                                    | 0.124                    |
| <i>Psychomantis borneensis</i> | Female | GSMC003490        | 42.055      | 14.700          | 0.795                                | 0.888                                | 7.503              | 9.053              | 0.106                                   | 0.098                                    | 0.102                    |
| <i>Psychomantis borneensis</i> | Male   | GSMC003903        | 33.761      | 11.903          | 0.396                                | 0.568                                | 5.944              | 7.736              | 0.067                                   | 0.073                                    | 0.070                    |
| <i>Psychomantis borneensis</i> | Male   | GSMC002148        | 31.155      | 12.356          | 0.608                                | 0.641                                | 6.329              | 7.939              | 0.096                                   | 0.081                                    | 0.088                    |
| <i>Anasigerpes bifasciata</i>  | Female | GSMC003537        | 22.573      | 6.751           | 0.222                                | 0.312                                | 4.058              | 5.292              | 0.055                                   | 0.059                                    | 0.057                    |
| <i>Anasigerpes bifasciata</i>  | Female | GSMC004531        | 24.652      | 6.760           | 0.181                                | 0.299                                | 4.005              | 5.202              | 0.045                                   | 0.057                                    | 0.052                    |
| <i>Anasigerpes bifasciata</i>  | Male   | GSMC003553        | 18.613      | 5.606           | 0.096                                | 0.093                                | 3.598              | 4.646              | 0.027                                   | 0.020                                    | 0.023                    |
| <i>Anasigerpes bifasciata</i>  | Male   | GSMC004128        | 18.728      | 5.369           | 0.082                                | 0.065                                | 3.489              | 4.408              | 0.024                                   | 0.015                                    | 0.019                    |
| <i>Oxypiloidea tridens</i>     | Male   | GSMC002107        | 19.941      | 5.564           | 0.307                                | 0.254                                | 2.944              | 4.200              | 0.104                                   | 0.060                                    | 0.079                    |
| <i>Oxypiloidea tridens</i>     | Female | GSMC002258        | 23.690      | 7.375           | 0.456                                | 0.329                                | 3.183              | 4.477              | 0.143                                   | 0.073                                    | 0.102                    |
| <i>Otomantis scutigera</i>     | Male   | B.Congo           | 20.150      | 4.200           | 0.044                                | 0.129                                | 4.044              | 5.160              | 0.011                                   | 0.025                                    | 0.019                    |
| <i>Otomantis scutigera</i>     | Male   | Lombardo specimen | 17.000      | 4.300           | -                                    | -                                    | -                  | -                  | -                                       | -                                        | -                        |
| <i>Otomantis scutigera</i>     | Female | Lombardo specimen | 22.500      | 5.800           | -                                    | -                                    | -                  | -                  | -                                       | -                                        | -                        |
| <i>Oxypilus hamatus</i>        | Male   | Nigeria CASENT    | 16.046      | 3.414           | 0.000                                | 0.000                                | 4.000              | 4.200              | 0.000                                   | 0.000                                    | 0.000                    |
| <i>Oxypilus hamatus</i>        | Male   | Nigeria CASENT    | 14.870      | 3.164           | 0.000                                | 0.000                                | 4.100              | 4.300              | 0.000                                   | 0.000                                    | 0.000                    |
| <i>Oxypilus hamatus</i>        | Female | Nigeria CASENT    | 14.500      | 4.100           | 0.000                                | 0.000                                | 5.000              | 5.000              | 0.000                                   | 0.000                                    | 0.000                    |



| <b>Taxon</b>              | <b>Sex</b> | <b>Specimen</b>  | <b>Body Length</b> | <b>Pronotum Length</b> | <b>Mesofemoral ventral apical lobe area</b> | <b>Metafemoral ventral apical lobe area</b> | <b>Mesofemoral Length</b> | <b>Metafemoral Length</b> | <b>Size ratio of mesofemoral leg lobe area</b> | <b>Size ratio of metathoracic leg lobe area</b> | <b>Total Prop Leg Lobe Area</b> |
|---------------------------|------------|------------------|--------------------|------------------------|---------------------------------------------|---------------------------------------------|---------------------------|---------------------------|------------------------------------------------|-------------------------------------------------|---------------------------------|
| <i>Oxyphilus nasutus</i>  | Female     | GSMC002189       | 15.388             | 5.213                  | 0.000                                       | 0.000                                       | 4.306                     | 5.173                     | 0.000                                          | 0.000                                           | 0.000                           |
| <i>Oxyphilus nasutus</i>  | Male       | GSMC002188       | 18.983             | 4.081                  | 0.000                                       | 0.000                                       | 4.540                     | 5.167                     | 0.000                                          | 0.000                                           | 0.000                           |
| <i>Oxyphilus nasutus</i>  | Male       | GSMC002187       | 21.378             | 4.550                  | 0.000                                       | 0.000                                       | 4.500                     | 5.000                     | 0.000                                          | 0.000                                           | 0.000                           |
| <i>Junodia amoena</i>     | Male       | GSMC002177       | 15.852             | 2.750                  | 0.047                                       | 0.070                                       | 3.962                     | 4.124                     | 0.012                                          | 0.017                                           | 0.014                           |
| <i>Junodia amoena</i>     | Female     | Malawi, Carnegie | 17.022             | 3.700                  | 0.101                                       | 0.097                                       | 3.728                     | 4.067                     | 0.027                                          | 0.024                                           | 0.025                           |
| <i>Hestiasula inermis</i> | Male       | CMNH             | 26.367             | 4.784                  | 0.000                                       | 0.000                                       | 5.402                     | 6.147                     | 0.000                                          | 0.000                                           | 0.000                           |
| <i>Hestiasula inermis</i> | Male       | CMNH             | 25.887             | 4.429                  | -                                           | -                                           | -                         | -                         | -                                              | -                                               | -                               |
| <i>Hestiasula inermis</i> | Male       | CMNH             | -                  | 4.479                  | -                                           | -                                           | -                         | -                         | -                                              | -                                               | -                               |
| <i>Hestiasula inermis</i> | Male       | CMNH             | 25.211             | 4.582                  | -                                           | -                                           | -                         | -                         | -                                              | -                                               | -                               |
| <i>Hestiasula inermis</i> | Female     | CMNH             | 27.149             | 5.932                  | 0.000                                       | 0.000                                       | 5.494                     | 6.475                     | 0.000                                          | 0.000                                           | 0.000                           |

**Table S3. Summarized measurement data for Hymenopodini.** Average measurements by sex for body length, pronotum length, and total proportional femoral leg lobe area. Standard deviations are included within parentheses. \*only a single female specimen was obtained for measurements.

| Taxon                            | Male body length | Female body length | Male pronotum length | Female pronotum length | Male total proportional femoral leg lobe area | Female total proportional femoral leg lobe area |
|----------------------------------|------------------|--------------------|----------------------|------------------------|-----------------------------------------------|-------------------------------------------------|
| <i>Creobroter pictipennis</i>    | 26.60 (3.31)     | 28.60 (0.96)       | 5.92 (0.41)          | 6.98 (0.25)            | 0.05 (0.01)                                   | 0.09 (0.01)                                     |
| <i>Creobroter apicalis</i>       | 25.47 (0.67)     | 32.71 (1.15)       | 6.52 (0.23)          | 8.93 (0.60)            | 0.13 (0.03)                                   | 0.21 (0.04)                                     |
| <i>Creobroter labuanae</i>       | 28.06 (0.52)     | 34.27 (3.68)       | 6.28 (0.13)          | 7.98 (0.46)            | 0.08 (0.01)                                   | 0.21 (0.02)                                     |
| <i>Panurgica fratercula</i> *    | 23.01 (0.68)     | 26.26 (-)          | 4.84 (0.03)          | 6.26 (-)               | 0.08 (0.02)                                   | 0.25 (-)                                        |
| <i>Panurgica compressicollis</i> | 28.52 (1.58)     | 39.06 (1.43)       | 5.71 (0.25)          | 7.29 (0.32)            | 0.13 (0.05)                                   | 0.37 (0.02)                                     |
| <i>Chloroharpax modesta</i>      | 24.52 (2.38)     | 28.71 (2.43)       | 4.96 (0.38)          | 6.60 (0.08)            | 0.02 (0.02)                                   | 0.01 (0.01)                                     |
| <i>Pseudocreobotra ocellata</i>  | 25.79 (2.22)     | 30.04 (2.88)       | 4.90 (0.28)          | 5.92 (0.61)            | 0.22 (0.08)                                   | 0.31 (0.04)                                     |
| <i>Chlidonoptera lestoni</i> *   | 29.23 (1.73)     | 33.20 (-)          | 6.25 (0.17)          | 8.39 (-)               | 0.18 (0.02)                                   | 0.59 (-)                                        |
| <i>Hymenopus coronatus</i>       | 28.10 (0.64)     | 53.47 (2.65)       | 5.90 (0.11)          | 13.05 (0.90)           | 1.12 (0.12)                                   | 4.41 (0.53)                                     |
| <i>Helvia cardinalis</i>         | 19.47 (4.34)     | 37.38 (7.57)       | 4.25 (0.65)          | 8.76 (0.71)            | 0.24 (0.04)                                   | 0.88 (-)                                        |
| <i>Theopropus elegans</i>        | 20.22 (0.51)     | 40.01 (2.51)       | 4.59 (0.11)          | 10.44 (0.51)           | 0.12 (0.01)                                   | 0.32 (0.03)                                     |

**Table S4. Sexual size dimorphism ratios for HOA taxa.** Size dimorphism for Hymenopodinae, Oxypilinae, and Acromantinae taxa represented as a female over male ratio for pronotum length and total proportional femoral leg lobe area.

| Subfamily     | Taxon                            | Pronotum length dimorphism | Total proportional femoral leg lobe area dimorphism |
|---------------|----------------------------------|----------------------------|-----------------------------------------------------|
| Hymenopodinae | <i>Creobroter pictipennis</i>    | 1.07                       | 1.66                                                |
| Hymenopodinae | <i>Creobroter apicalis</i>       | 1.28                       | 1.53                                                |
| Hymenopodinae | <i>Creobroter labuanae</i>       | 1.22                       | 2.74                                                |
| Hymenopodinae | <i>Panurgica fratercula</i>      | 1.14                       | 2.98                                                |
| Hymenopodinae | <i>Panurgica compressicollis</i> | 1.37                       | 2.83                                                |
| Hymenopodinae | <i>Chloroharpax modesta</i>      | 1.17                       | 0.42                                                |
| Hymenopodinae | <i>Pseudocreobotra ocellata</i>  | 1.16                       | 1.41                                                |
| Hymenopodinae | <i>Chlidonoptera lestoni</i>     | 1.14                       | 3.29                                                |
| Hymenopodinae | <i>Hymenopus coronatus</i>       | 1.90                       | 3.93                                                |
| Hymenopodinae | <i>Helvia cardinalis</i>         | 1.92                       | 3.71                                                |
| Hymenopodinae | <i>Theopropus elegans</i>        | 1.98                       | 2.75                                                |
| Hymenopodinae | <i>Anaxarcha intermedia</i>      | 1.38                       | 0.00                                                |
| Hymenopodinae | <i>Anaxarcha limbata</i>         | 1.35                       | 0.00                                                |
| Hymenopodinae | <i>Heliomantis elegans</i>       | 1.38                       | 0.00                                                |
| Hymenopodinae | <i>Odontomantis pulchra</i>      | 1.33                       | 0.00                                                |
| Hymenopodinae | <i>Odontomantis micans</i>       | 1.34                       | 0.00                                                |
| Acromantinae  | <i>Acromantis insularis</i>      | 1.22                       | 2.59                                                |
| Acromantinae  | <i>Citharomantis falcata</i>     | 1.38                       | 3.61                                                |
| Acromantinae  | <i>Majangella ophirensis</i>     | 1.18                       | 1.00                                                |
| Acromantinae  | <i>Psychomantis borneensis</i>   | 1.30                       | 1.43                                                |
| Acromantinae  | <i>Anasigerpes bifasciata</i>    | 1.26                       | 2.63                                                |
| Acromantinae  | <i>Oxypiloidea tridens</i>       | 1.19                       | 1.31                                                |
| Acromantinae  | <i>Otomantis scutigera</i>       | 1.21                       | 2.00                                                |
| Oxypilinae    | <i>Oxypilus hamatus</i>          | 0.94                       | 0.00                                                |
| Oxypilinae    | <i>Oxypilus nasutus</i>          | 0.76                       | 0.00                                                |
| Oxypilinae    | <i>Junodia amoena</i>            | 1.07                       | 1.76                                                |
| Oxypilinae    | <i>Hestiasula inermis</i>        | 1.05                       | 0.00                                                |

**Table S5. Kruskal-Wallis tests on trait data for Hymenopodini.** Male pronotum length, female pronotum length, and male and female proportional leg lobe area were tested for five groupings across the tribe between and within THH taxa and other Hymenopodini taxa.

| Group tests                                                                       | Male pronotum length | Female pronotum length | Male total proportional femoral leg lobe area | Female total proportional femoral leg lobe area |
|-----------------------------------------------------------------------------------|----------------------|------------------------|-----------------------------------------------|-------------------------------------------------|
| THH clade vs. Outgroup Hymenopodini                                               | 0.00434700           | 0.00001164             | 0.00292000                                    | 0.00034860                                      |
| <i>(Theopropus + Helvia)</i> vs. Outgroup Hymenopodini                            | 0.00020950           | 0.00027870             | 0.29650000                                    | 0.01298000                                      |
| <i>Hymenopus</i> vs. Outgroup Hymenopodini                                        | 0.76870000           | 0.00185000             | 0.00034460                                    | 0.00183500                                      |
| <i>Hymenopus</i> vs. (Outgroup Hymenopodini + <i>Helvia</i> + <i>Theopropus</i> ) | 0.71100000           | 0.00141800             | 0.00029740                                    | 0.00143900                                      |
| <i>Hymenopus</i> vs. <i>(Theopropus + Helvia)</i>                                 | 0.00448300           | 0.00815100             | 0.00605400                                    | 0.01005000                                      |

**Table S6. Kruskal-Wallis tests on SSD ratios across HOA taxa.** Two group tests between THH (including and excluding *Hymenopus*) and HOA taxa were performed for SSD ratios of pronotum length, and total proportional femoral leg lobe area.

| Group tests                                | Pronotum length dimorphism | Total proportional femoral leg lobe area dimorphism |
|--------------------------------------------|----------------------------|-----------------------------------------------------|
| THH clade vs. HOA clade                    | 0.005436                   | 0.012380                                            |
| <i>(Theopropus + Helvia)</i> vs. HOA clade | 0.020790                   | 0.050850                                            |

**Table S7. Correlation of SSD ratios with male and female size.** Values of pronotum length tested against pronotum SSD ratios for males and females including Pearson product-moment correlation coefficient p-value for Y contrasts vs. X contrasts (positivised) as well as Felsenstein's contrasts.

| Correlation tests                                     | Felsenstein's Contrasts (p-value) | Positivised Contrasts (2-tailed p-value) | Positivised Contrasts (1-tailed p-value) | Positivised Contrasts (Least Squares Regression Slope) |
|-------------------------------------------------------|-----------------------------------|------------------------------------------|------------------------------------------|--------------------------------------------------------|
| Male pronotum length vs. Pronotum length dimorphism   | 0.205148                          | 0.4102972                                | 0.205148                                 | -0.5117949                                             |
| Female pronotum length vs. Pronotum length dimorphism | 0.0010624                         | 0.002124                                 | 0.00106                                  | 4.346948                                               |

**Table S8. Posterior model distribution.** Bayesian analysis of macroevolutionary mixtures posterior distribution represented as percentages for rate shift models for trait data and SSD ratios.

| Rate shift model | Pronotum length dimorphism | Total proportional femoral leg lobe area dimorphism | Male pronotum length | Female pronotum length | Male total proportional femoral leg lobe area | Female total proportional femoral leg lobe area |
|------------------|----------------------------|-----------------------------------------------------|----------------------|------------------------|-----------------------------------------------|-------------------------------------------------|
| 0                | 2.0%                       | 0.0%                                                | 49.0%                | 41.0%                  | 0.0%                                          | 0.0%                                            |
| 1                | 50.0%                      | 12.0%                                               | 29.0%                | 32.0%                  | 71.0%                                         | 70.0%                                           |
| 2                | 30.0%                      | 9.6%                                                | 14.0%                | 17.0%                  | 23.0%                                         | 24.0%                                           |
| 3                | 12.0%                      | 42.0%                                               | 5.5%                 | 6.7%                   | 5.3%                                          | 5.6%                                            |
| 4                | 3.6%                       | 24.0%                                               | 1.8%                 | 2.2%                   | 1.0%                                          | 1.0%                                            |
| 5                | 0.9%                       | 8.8%                                                | 0.6%                 | 0.6%                   | 0.2%                                          | 0.2%                                            |
| 6                | 0.2%                       | 2.4%                                                | 0.1%                 | 0.2%                   | 0.0%                                          | 0.0%                                            |
| 7                | 0.0%                       | 0.6%                                                | 0.0%                 | 0.0%                   | 0.0%                                          | 0.0%                                            |
| 8                | 0.0%                       | 0.1%                                                | 0.0%                 | 0.0%                   | 0.0%                                          | 0.0%                                            |
| 9                | 0.0%                       | 0.0%                                                | 0.0%                 | 0.0%                   | 0.0%                                          | 0.0%                                            |

**Table S9. Shift model support.** Bayes factors of rate shift models relative to the null shift model in Bayesian analysis of macroevolutionary mixtures for trait data and SSD ratios.

| Rate shift model | Pronotum length dimorphism | Total proportional femoral leg lobe area dimorphism | Male pronotum length | Female pronotum length | Male total proportional femoral leg lobe area | Female total proportional femoral leg lobe area |
|------------------|----------------------------|-----------------------------------------------------|----------------------|------------------------|-----------------------------------------------|-------------------------------------------------|
| 0                | 1.00                       | 0.00                                                | 1.00                 | 1.00                   | 1.00                                          | 1.00                                            |
| 1                | 25.25                      | 1.00                                                | 0.88                 | 1.13                   | 2287.01                                       | 8352.47                                         |
| 2                | 29.41                      | 1.49                                                | 0.83                 | 1.16                   | 1402.64                                       | 5470.12                                         |
| 3                | 27.74                      | 15.69                                               | 0.77                 | 1.11                   | 790.85                                        | 3132.96                                         |
| 4                | 24.04                      | 26.38                                               | 0.74                 | 1.06                   | 428.48                                        | 1666.43                                         |
| 5                | 20.47                      | 31.51                                               | 0.76                 | 0.96                   | 223.90                                        | 1029.89                                         |
| 6                | 16.32                      | 31.75                                               | 0.63                 | 0.96                   | 141.97                                        | 658.78                                          |
| 7                | 13.78                      | 29.05                                               | 0.77                 | 0.91                   | 81.32                                         | 346.41                                          |
| 8                | 13.84                      | 24.47                                               | 0.69                 | 1.03                   | 49.27                                         | 367.31                                          |
| 9                | 3.58                       | 17.85                                               | 0.22                 | 0.50                   | 0.00                                          | 0.00                                            |

**Table S10. Trait data and ratios fit to phylogeny.** Phylogenetic independent contrasts testing fit of tip data to tree for measurements (Hymenopodini taxa only) and ratios (HOA clade). Plots of absolute values of the standardized phylogenetically independent contrasts versus their standard deviations provided least-squares linear regression slopes, none of which differed significantly from zero ( $p < 0.05$ ) indicating that we can reject a tree exhibiting significant lack of fit to tip data.

| PIC of Traits                  | Male pronotum length | Female pronotum length | Male total proportional femoral leg lobe area | Female total proportional femoral leg lobe area | Body length dimorphism | Pronotum length dimorphism | Total proportional femoral leg lobe area dimorphism |
|--------------------------------|----------------------|------------------------|-----------------------------------------------|-------------------------------------------------|------------------------|----------------------------|-----------------------------------------------------|
| Data Points                    | 10                   | 10                     | 10                                            | 10                                              | 26                     | 26                         | 26                                                  |
| F statistic                    | 0.07208              | 0.03832                | 0.36202                                       | 0.27882                                         | 0.00002                | 0.37961                    | 2.31415                                             |
| t statistics                   | -0.26848             | -0.19575               | -0.60168                                      | -0.52803                                        | 0.00469                | 0.61613                    | -1.52123                                            |
| d.f                            | 8                    | 8                      | 8                                             | 8                                               | 24                     | 24                         | 24                                                  |
| p value - 2 tailed             | 0.79512              | 0.84969                | 0.56405                                       | 0.61181                                         | 0.99630                | 0.54361                    | 0.14127                                             |
| p value - 1 tailed             | 0.39756              | 0.42484                | 0.28202                                       | 0.30590                                         | 0.49815                | 0.27181                    | 0.07063                                             |
| Least Squares Regression Slope | -1.58964             | -3.61249               | -1.92164                                      | -7.14195                                        | 0.00209                | 0.31973                    | -3.32829                                            |
